# Supplementary material for: Investigating Nutrition and Hydration Knowledge and Practice among a Cohort of Age-Grade Rugby Union Players
Source: MDPI journal article supplement (doi:10.3390/nu16040533), 2024-02-14
Supplement: s1 [file s1]

**Table S1.** Participants Training Schedule and Data Collection Process

| Week One Residential Training Schedule at the University of Limerick and Data Collection Process                             |                                                |                                                        |                                                  |                                                  |
|------------------------------------------------------------------------------------------------------------------------------|------------------------------------------------|--------------------------------------------------------|--------------------------------------------------|--------------------------------------------------|
| Time                                                                                                                         | Monday                                         | Tuesday                                                | Thursday                                         | Friday                                           |
| 08:00                                                                                                                        |                                                | Arrive & Markers                                       |                                                  | Arrive & Markers                                 |
| 08:30                                                                                                                        |                                                | <b><i>Urine Sample 2</i></b>                           |                                                  | <b><i>Urine Sample 4</i></b>                     |
| 09:00                                                                                                                        |                                                | Forwards Gym/Backs Pitch Speed Session                 |                                                  | Team Meeting & Strapping                         |
| 09:30                                                                                                                        | Arrive, Markers & <b><i>Urine Sample 1</i></b> | Backs Gym/Forwards Pitch Speed Session                 |                                                  | Rugby Pitch Session – 60mins                     |
| 10:00                                                                                                                        | Anthropometric Data Collection                 | Snacks BYO & Strapping                                 | Arrive & Markers                                 |                                                  |
| 10:30                                                                                                                        | Team Meeting & Strapping                       | Rugby Pitch Session – 60mins                           | <b><i>Urine Sample 3</i></b>                     | Snacks BYO                                       |
| 11:00                                                                                                                        | Rugby Pitch Session – 75mins                   |                                                        | Team Meeting & Strapping                         | Backs Gym/Forwards Pitch Speed Session           |
| 11:30                                                                                                                        |                                                |                                                        |                                                  |                                                  |
| 12:00                                                                                                                        |                                                | Debrief                                                | Rugby Challenge Match – 90mins                   | Forwards Gym/Backs Pitch Speed Session           |
| 12:30                                                                                                                        | Lunch                                          | Take Away Lunch & Depart                               |                                                  |                                                  |
| 13:00                                                                                                                        | Backs Gym/Forwards Speed Session               |                                                        |                                                  | Debrief                                          |
| 13:30                                                                                                                        |                                                |                                                        |                                                  | Take Away Lunch & Depart                         |
| 14:00                                                                                                                        | Forwards Gym/Backs Speed Session               |                                                        | Lunch                                            |                                                  |
| 14:30                                                                                                                        |                                                |                                                        |                                                  |                                                  |
| 15:00                                                                                                                        | Accommodation                                  |                                                        | Accommodation                                    |                                                  |
| P.M.                                                                                                                         | Education – 60mins                             | <b><i>Distribution of HAQ</i></b>                      | Education – 60mins                               |                                                  |
| Week Two Non-Residential Training Schedule at the University of Limerick and Musgrave Park, Cork and Data Collection Process |                                                |                                                        |                                                  |                                                  |
| Time                                                                                                                         | Monday                                         | Tuesday                                                | Thursday                                         | Friday                                           |
| 09:00                                                                                                                        |                                                |                                                        | Arrive & Markers                                 |                                                  |
| 09:30                                                                                                                        |                                                |                                                        | Team Meeting Review                              | Arrive & Markers                                 |
| 10:00                                                                                                                        | Arrive & Markers                               | Arrive & Markers                                       | Strapping                                        | Forwards Gym/Backs Pitch Speed Session           |
| 10:30                                                                                                                        | Team Meeting & Strapping                       | <b><i>Urine Sample 5</i></b>                           | Rugby Pitch Session – 60mins                     | Backs Gym/Forwards Pitch Speed Session           |
| 11:00                                                                                                                        | Rugby Pitch Session – 75mins                   | Team Meeting & Strapping                               |                                                  | Snacks BYO & Strapping                           |
| 11:30                                                                                                                        |                                                | Rugby Challenge Match – 90mins                         | Snacks BYO                                       | Rugby Pitch Session – 60mins                     |
| 12:00                                                                                                                        |                                                |                                                        | Backs Gym/Forwards Pitch Speed Session           |                                                  |
| 12:30                                                                                                                        | Snacks BYO & Depart                            |                                                        | Forwards Gym/Backs Pitch Speed Session           | Debrief                                          |
| 13:00                                                                                                                        |                                                | Debrief                                                | Debrief                                          | Take Away Lunch & Depart                         |
| 13:30                                                                                                                        |                                                | Take Away Lunch & Depart                               | Take Away Lunch & Depart                         |                                                  |
| 14:00                                                                                                                        |                                                |                                                        |                                                  |                                                  |
| P.M.                                                                                                                         | <b><i>Distribution of NSKQ</i></b>             | Distribution of Food Record Instructions               | <b><i>Food Record Provisional Day 1 or 2</i></b> | <b><i>Food Record Provisional Day 2 or 3</i></b> |
|                                                                                                                              |                                                | <b><i>Wednesday –Food Record Provisional Day 1</i></b> |                                                  |                                                  |

BYO bring your own, Monday and Thursday training during week two took place in Musgrave Park, Cork, with Tuesday and Friday training taking place in the University of Limerick, Food Records began on Wednesday of week two which was a rest day, Data collection points in **Bold and Italics**, participants began food records on Wednesday or Thursday of week two
