# Supplementary material for: Investigating Nutrition and Hydration Knowledge and Practice among a Cohort of Age-Grade Rugby Union Players
Source: Nutrients. 2024 Feb 14;16(4):533. doi: 10.3390/nu16040533 (PMC10891571; doi:10.3390/nu16040533)
Supplement: Supplementary file 1 [file nutrients-16-00533-s001.zip]

Archive with 4 entries (4 files):
- File S1. Copy of The Nutrition for Sport Knowledge Questionnaire.pdf
- File S2. Copy of The Hydration Assessment Questionnaire.pdf
- File S3. Copy of Study Background and Libro App Information Presentation.pdf
- Table S1. Participants Training Schedule and Data Collection Process.pdf
